# Supplementary material for: Synthesis of polyacrylonitrile nanoflowers and their controlled pH-sensitive drug release behavior
Source: Royal Society of Chemistry journal article supplement (doi:10.1039/d0ra01427c), 2020-01-01
Supplement: d0ra01427c1.pdf [file d0ra01427c1.pdf]

1 **Supplementary Material**

2

3 **Synthesis of polyacrylonitrile nanoflowers and its controlled**  
4 **pH-sensitive drug release behavior**

5

6

7 Qi Lian<sup>a</sup>, Han Liu<sup>a</sup>, Xuefang Zheng<sup>a,b\*</sup>, Dandan Jia<sup>a</sup>, Chun Liu<sup>a</sup>, Dongjun Wang<sup>a,c</sup>

8

9 a College of Chemical Engineering, Hebei Normal University of Science and

10 Technology, Qinhuangdao 066600, P. R.China

11 b School of Chemical Engineering and Technology, Hebei University of

12 Technology, Tianjin 300130, P. R. China

13 c Analysis and Testing Center, Hebei Normal University of Science and Technology,

14 Qinhuangdao 066600, P. R.China)

15

16 \*Corresponding Author: E-mail: xuefang-zheng@163.com; TEL: +86-15076097048

17 College of Chemical Engineering, Hebei Normal University of Science and

18 Technology, Qinhuangdao 066600, P. R.China

19

20

## 1 **1 Characterizations:**

### 2 **1.1 FTIR**

3 Fourier transform infrared (FTIR) spectra of PAN nanoflowers in KBr disc form  
4 were recorded on FTIR spectrometer (360SX, Nicolet, Minnesota) from 400 to 4000  
5  $\text{cm}^{-1}$  with a resolution  $4 \text{ cm}^{-1}$  and 100 scans.

### 6 **1.2 SEM analysis**

7 The morphology of the PAN nanoflowers was investigated by scanning electron  
8 microscopy (SEM) (JSM-6460LV, JEOL, Japan). The nanoflowers were coated with  
9 gold for enhancing conductivity before scanning.

### 10 **1.3. TEM analysis**

11 The size and morphology of PAN nanoflowers were characterized by  
12 transmission electron microscope (TEM, H-7650, Hitachi Inc.). The sample for TEM  
13 analysis was obtained by placing a drop of the nanoflowers dispersed ethyl solution  
14 onto a copper micro-grid and evaporated in  $20 \text{ }^\circ\text{C}$ .

### 15 **1.4. XRD**

16 The structure of the PAN nanoflowers was characterized by XRD (Philips,  
17 Holland). The X-ray diffraction patterns were taken from  $10^\circ$  to  $60^\circ$  ( $2\theta$  value) using  
18 Cu K $\alpha$  radiation with an intensity ratio ( $a_1/a_2$ ) = 0.5 and wavelengths of 1.54439 and  
19  $1.54056 \text{ }^\circ\text{A}$ , respectively.

## 20 **2. Swelling ratio**

21 The swelling properties of PAN(TBP), PAN(MA), PAN(EA) and P(NA-St)  
22 nanoflowers were studied in different buffer solutions with pH 1.0, 6.8 and 7.4.

1 Nanoflowers of PAN with a known weight ( $W_o$ ) were immersed in buffer solution at  
2 37°C. The nanoflowers were then removed from the buffer solution at predetermined  
3 intervals and the excess solution was removed from the surface with a wet filter paper  
4 and weighed. The swelling ratio(SR) can be calculated as a function of time:

$$5 \quad \% \text{Swelling ratio(SR)} = [(W_t - W_o) / W_o] \times 100\% \quad (1)$$

6 where,  $W_o$  was the dried weight of PAN nanoflowers before immersed in buffer  
7 solution,  $W_t$  was the weight of nanoflowers at time  $t$  after immersed in buffer solution.

### 8 **3. Adsorption and selectivity experiments**

9 100mg PAN nanoflowers were soaked in the BSA solution with the  
10 concentration range from 0.2mg/ml to 1.8mg/ml for 12 hours to the adsorption  
11 equilibrium at room temperature, and then 0.4ml supernatant was withdraw and  
12 determined with UV-vis(  $\lambda$  max= 279 nm) after dilution to a certain volume. The  
13 equilibrium binding capacity of BSA( $Q_e$ ) was calculated according to the formula (2)  
14 as follows.

$$15 \quad Q_e = \frac{V(C_0 - C_e)}{m} \quad (2)$$

16 Where  $Q_e$  denotes the equilibrium binding capacity of BSA (mg/g),  $C_0$  is the initial  
17 concentration solution(mg/L);  $C_e$  is the substrate concentration of the solution after  
18 adsorption equilibrium(mg/L);  $V$  and  $m$  represent the volume of the adsorbed solution  
19 (ml) and the mass of the PAN nanoflowers(g).

### 20 **3 The release rate of BSA in mimicking stomach acidic fluids.**

21 1.7778g proteases was dissolved in 100ml buffer solution with pH 1.0. And then 30  
22 ml of the above mixture was transferred to the covered triangle bottle with pipette.

1 The drug loading PAN nanoparticles (0.5g) was dissolved in the above covered  
2 triangular bottle. Five copied the above solution was prepared. Then, the above  
3 triangle bottle was oscillated for a certain time in the table constant temperature  
4 shaker at a frequency of 80 times /min. After centrifugation, the substratum  
5 precipitation was scattered into 100ml phosphate buffer solution at pH 7.4 to release  
6 for 30h. The kinetics of drug release were recorded using a dissolution tester RCZ-1  
7 A coupled with an UV Hewlett Packard spectrophotometer for detection of BSA  
8 ( $\lambda_{\max} = 279$  nm). Therefore, the concentration of BSA broken by proteases in  
9 mimicking stomach acidic fluids from the formula (3).

$$Q = \frac{c_0 - c_1}{c_0} \times 100\% \quad (3)$$

10  
11 Where Q donates the drug release rate of BSA broken by proteases in mimicking  
12 stomach acidic fluids,  $C_0$  is the drug loading concentration of BSA in the pH 1.0  
13 buffer solution;  $C_1$  is the concentration of BSA after drug release in the pH 7.4  
14 phosphate buffer solution.

#### 15 **4. In vitro controlled release of BSA**

16 Nanoparticles were immersed in 20 ml of 10 mg BSA in sodium hydroxide  
17 solution for 12 h at 37°C, and then were centrifuged at 10000rpm for 10min and dried  
18 under vacuum. Nanoparticles loading with BSA were suspended in 40 ml 0.1mol/l  
19 phosphate buffer solution at different pH (1.0, 6.8, 7.4). The entire system was  
20 maintained at 37 °C±0.5°C with gently shaking. Periodically, 0.4 ml of the release  
21 medium was withdrawn and the supernatant after separation was stored at 4 °C for  
22 UV-vis analysis. The total mass of released BSA ( $Q$ ) at each moment of the

1 experiment was calculated as formula (4), taking into account the aliquots taken. The  
2 kinetics of drug release were recorded using a dissolution tester RCZ-1 A coupled  
3 with an UV Hewlett Packard spectrophotometer for detection of BSA ( $\lambda_{\max} = 279$   
4 nm ) and presented using the diffusion equation as the ratio of the amount of drug  
5 released at the time  $t(M_t)$ / the total amount ( $M_{\text{inf}}$ ) of drug released from the tablet.

$$6 \quad Q = \frac{C_n \times V_0 + V_i \sum_{i=1}^{n-1} C_i}{m} \times 100\% \quad (4)$$

7 Where  $Q$ ,  $C_n$ ,  $C_i$ ,  $V_0$  and  $m$  denote the cumulative release rate (%), the mass  
8 concentration of drug release medium after the  $n$ -th sampling (mg/ml), the mass  
9 concentration of drug release after the  $i$ -th sampling (mg/ml), the volume of the  
10 release medium (ml), and the total drug loading (mg), respectively.

11

12

1

2

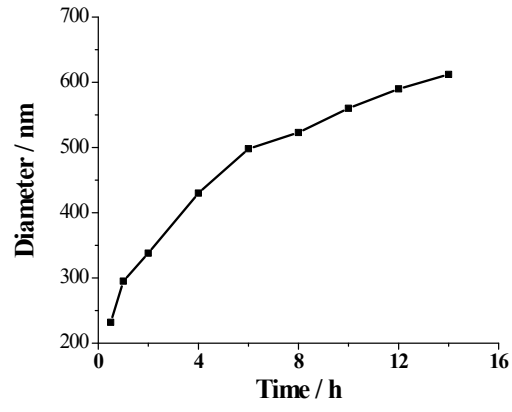

3

4

Figure S1 The size growth of PAN nanoflowers with time

5

6

1

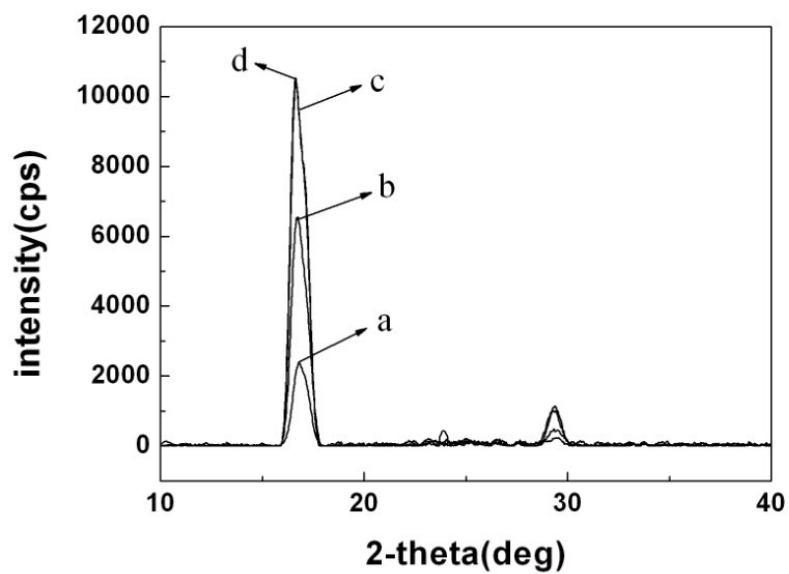

2

3 Figure S2 XRD patterns of PAN nanoparticles in different medium

4 a) methyl acetate, b) ethyl acetate, c) butyl acetate, d) isoamyl acetate

5

1

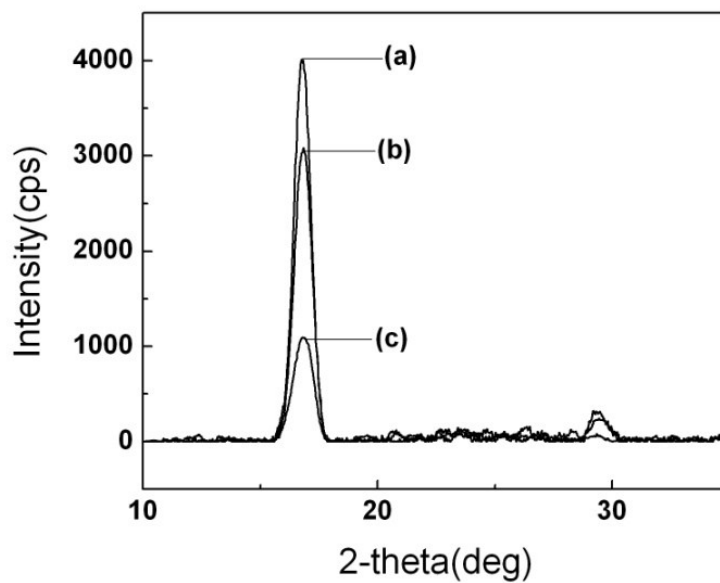

2

3 Figure S3 XRD patterns of PAN nanoparticles at different styrene  
4 concentrations(wt%): (a) 0.25wt% (b) 1.0wt% (c) 2.0wt%

5

6



1

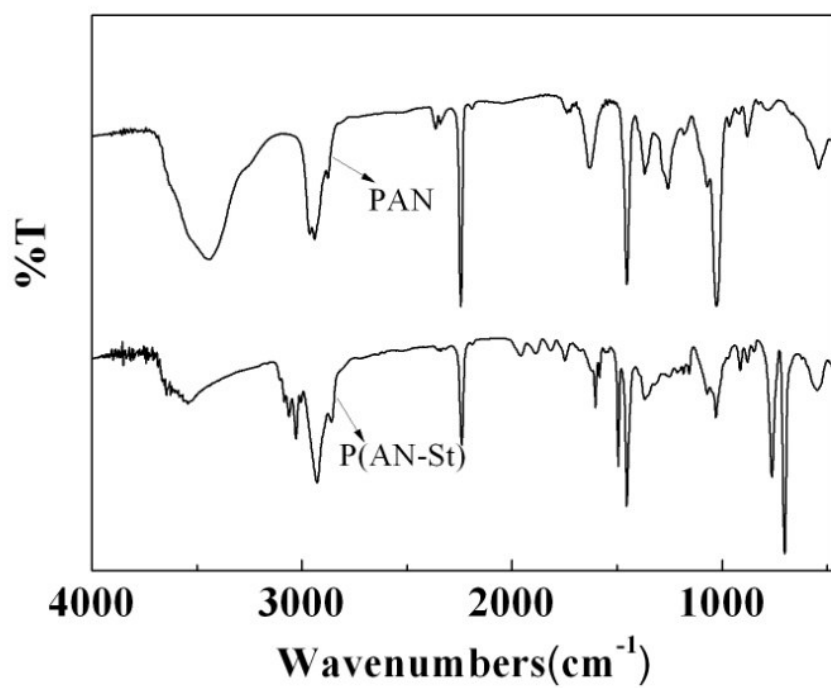

2

3

4

5

Figure S4 Infrared spectra of PAN and P (AN-St)

1

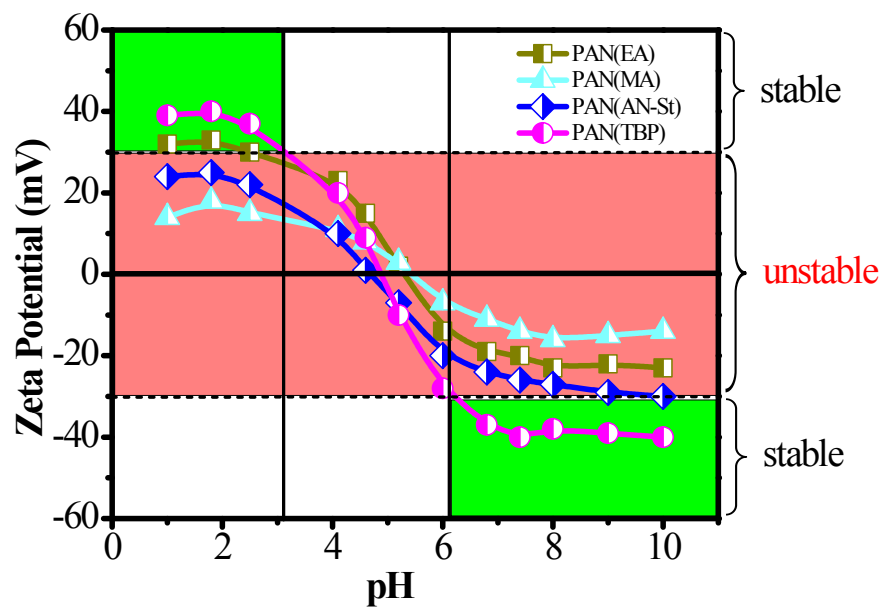

2

3 Figure S5 Effect of pH on zeta potential of drug loading PAN nanoparticles.

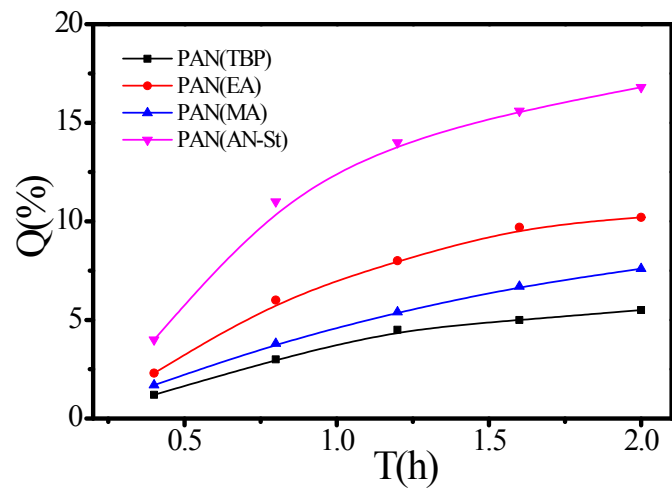

1

2 Figure S6 The concentration of BSA broken by proteases in mimicking stomach

3 acidic fluids.

4

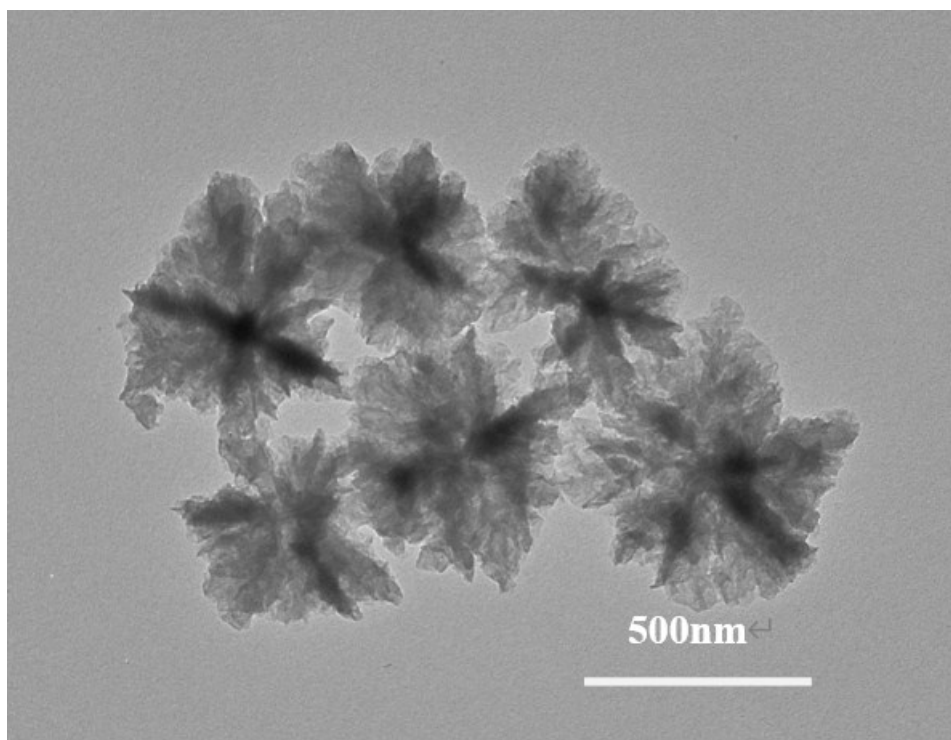

1  
2  
3  
4

Figure S7 SEM image of the PAN(TBP) after release of BSA.
